# Supplementary material
Source: PubMed Central journal article supplement (PMC4200278)
Supplement: supp_M114.604009_jbc.M114.604009-1.pdf [file supp_M114.604009_jbc.M114.604009-1.pdf]

## Supplemental Material

**Table S1. Remaining 32 peptidases/proteases identified by mass spectrometry analysis.**

| Peptidase /Protease                                      | Rank | Access. # | Name     | Size | A  | B  | C  | D   |
|----------------------------------------------------------|------|-----------|----------|------|----|----|----|-----|
| Aspartocyclase 2                                         | 289  | Q8R3PO    | Aspa     | 35   | 11 | 14 | 17 | 51% |
| Tripeptidyl-peptidase 1                                  | 298  | O89023    | Tpp1     | 61   | 3  | 3  | 15 | 13% |
| Caspase 6                                                | 299  | O08738    | Casp6    | 32   | 8  | 10 | 12 | 30% |
| Complement component 2                                   | 331  | B8JJNO    | GM20547  | 142  | 12 | 14 | 15 | 13% |
| Cathepsin A                                              | 335  | P16675    | Ctsa     | 54   | 7  | 10 | 13 | 20% |
| Proteasome activator complex subunit 1                   | 390  | P97371    | Psme1    | 29   | 6  | 7  | 10 | 41% |
| Ubiquitin specific peptidase 39                          | 382  | Q3TIX9    | Usp39    | 65   | 10 | 10 | 11 | 23% |
| Lon protease homolog                                     | 393  | Q8CGK3    | Lonp1    | 106  | 7  | 10 | 10 | 10% |
| Aminopeptidase N                                         | 434  | P97449    | Anpep    | 110  | 4  | 4  | 5  | 11% |
| Cathepsin D                                              | 446  | P18242    | Ctsd     | 45   | 6  | 7  | 8  | 23% |
| Aspartoacylase 3                                         | 455  | Q91XE4    | Acy3     | 35   | 6  | 7  | 7  | 38% |
| Ubiquitin conjugating enzyme E2 variant 3                | 471  | Q3U1V6    | Uevld    | 52   | 5  | 6  | 9  | 14% |
| Methionine aminopeptidase                                | 488  | Q8BP48    | Metap1   | 43   | 7  | 7  | 7  | 31% |
| 26S proteasome non-ATP regulatory subunit 8              | 512  | Q9CX56    | Psmd8    | 40   | 4  | 6  | 7  | 26% |
| Proteasome activator complex subunit 2                   | 517  | P97372    | Psme2    | 27   | 3  | 5  | 8  | 17% |
| Caspase 9                                                | 542  | Q8C3Q9    | Casp9    | 50   | 5  | 5  | 5  | 20% |
| Carboxypeptidase Q                                       | 560  | Q9WVJ3    | Cpq      | 52   | 4  | 5  | 6  | 13% |
| Angiotensin-converting enzyme 1                          | 591  | P09470    | Ace      | 151  | 4  | 4  | 4  | 4%  |
| Carboxypeptidase B2 (or U)                               | 594  | Q9JHH6    | Cpb2     | 49   | 4  | 4  | 4  | 21% |
| ER aminopeptidase                                        | 616  | Q9EQH2    | Erap1    | 107  | 4  | 4  | 5  | 5%  |
| Proteasome activator complex subunit 3                   | 669  | P61290    | Psme3    | 30   | 4  | 5  | 5  | 20% |
| Ubiquitin conjugating enzyme E2 variant 1                | 679  | Q9CZY3    | Ube2v1   | 16   | 3  | 3  | 4  | 24% |
| Meprin A subunit $\beta$                                 | 745  | Q61847    | Mep1b    | 80   | 3  | 3  | 3  | 9%  |
| Putative ATP-dependent Clp protease proteolytic subunit  | 766  | O88696    | Clpp     | 30   | 3  | 3  | 3  | 16% |
| Mitochondrial intermediate protease                      | 800  | A6H611    | Mipep    | 81   | 2  | 2  | 2  | 3%  |
| Ubiquitin conjugating enzyme E2 N                        | 809  | P61089    | Ube2n    | 17   | 2  | 3  | 3  | 20% |
| Cathepsin L1                                             | 930  | P06797    | Ctsl1    | 38   | 2  | 3  | 3  | 21% |
| Ubiquitin conjugating enzyme E2 R2                       | 950  | Q6ZWZ2    | Ube2r2   | 27   | 2  | 2  | 3  | 10% |
| Cathepsin S                                              | 991  | O70370    | Ctss     | 38   | 2  | 2  | 2  | 11% |
| ADAMTS-20                                                | 1011 | P59511    | Adamts20 | 212  | 2  | 2  | 2  | 2%  |
| ADAMTS-like protein 4                                    | 1045 | Q80T21    | Adamtsl4 | 113  | 2  | 2  | 2  | 4%  |
| ATP-dependent Clp protease ATP binding subunit clpx like | 1094 | Q9JHS4    | Clpx     | 69   | 2  | 2  | 2  | 4%  |

From 1119 proteins identified by MudPIT. Rank = position of the protein in the list sorted by total spectrum count. (A) exclusive unique peptides, (B) exclusive unique spectra, (C) total spectra, and (D) % coverage. The complete list of proteins is available upon request.
